# Supplementary material
Source: MDPI journal article supplement (https://www.mdpi.com/2076-3298/9/1/10)
Supplement: s1 [file s1]

## Article

# Tin and Antimony as Soil Pollutants along Railway Lines—A Case Study from North-Western Croatia

Zvezdana Stančić <sup>1,\*</sup>, Željka Fiket <sup>2</sup> and Andreja Vuger <sup>1</sup>
<sup>1</sup> Faculty of Geotechnical Engineering, University of Zagreb, Hallerova aleja 7, HR-42000 Varaždin, Croatia; andrejavuger@gmail.com

<sup>2</sup> Division for Marine and Environmental Research, Ruđer Bošković Institute, Bijenička cesta 54, HR-10000 Zagreb, Croatia; zeljka.fiket@irb.hr

\* Correspondence: zvstan@gfv.hr; Tel.: +385-42-408-947

## Supplementary Materials

**Table S1.** Contamination factors (CFs) for each metalloid and sampling site.

| Values<br>mg/kg<br>No. of site | CFs                                                            |            |                                                                                            |         |            |            |                                                                 |           |
|--------------------------------|----------------------------------------------------------------|------------|--------------------------------------------------------------------------------------------|---------|------------|------------|-----------------------------------------------------------------|-----------|
|                                | Calculated in regards to background value in northwest Croatia |            | Calculated in regards to minimum and maximum values for north-eastern part of Croatia [71] |         |            |            | Calculated in regards to the median for European top-soils [71] |           |
|                                | 4.13<br>Sn                                                     | 1.67<br>Sb | 4<br>Sn                                                                                    | 7<br>Sn | 0.83<br>Sb | 1.46<br>Sb | 3<br>Sn                                                         | 0.6<br>Sb |
| 1                              | 1.0                                                            | 0.7        | 1.0                                                                                        | 0.6     | 1.5        | 0.8        | 1.3                                                             | 2.0       |
| 2                              | 3.5                                                            | 5.2        | 3.6                                                                                        | 2.1     | 10.5       | 6.0        | 4.8                                                             | 14.5      |
| 3                              | 1.9                                                            | 0.6        | 2.0                                                                                        | 1.1     | 1.2        | 0.7        | 2.6                                                             | 1.6       |
| 4                              | 2.0                                                            | 0.9        | 2.1                                                                                        | 1.2     | 1.8        | 1.0        | 2.7                                                             | 2.5       |
| 5                              | 1.9                                                            | 3.0        | 2.0                                                                                        | 1.1     | 6.1        | 3.5        | 2.6                                                             | 8.4       |
| 6                              | 3.5                                                            | 3.6        | 3.6                                                                                        | 2.0     | 7.2        | 4.1        | 4.8                                                             | 10.0      |
| 7                              | 2.3                                                            | 1.0        | 2.3                                                                                        | 1.3     | 1.9        | 1.1        | 3.1                                                             | 2.6       |
| 8                              | 1.7                                                            | 0.7        | 1.8                                                                                        | 1.0     | 1.3        | 0.8        | 2.4                                                             | 1.8       |
| 9                              | 1.7                                                            | 0.7        | 1.8                                                                                        | 1.0     | 1.4        | 0.8        | 2.3                                                             | 2.0       |
| 10                             | 1.8                                                            | 1.0        | 1.8                                                                                        | 1.0     | 2.0        | 1.1        | 2.4                                                             | 2.8       |
| 11                             | 1.7                                                            | 1.0        | 1.8                                                                                        | 1.0     | 2.1        | 1.2        | 2.4                                                             | 2.9       |
| 12                             | 4.5                                                            | 5.3        | 4.7                                                                                        | 2.7     | 10.7       | 6.1        | 6.3                                                             | 14.9      |
| 13                             | 3.9                                                            | 5.2        | 4.0                                                                                        | 2.3     | 10.4       | 5.9        | 5.4                                                             | 14.4      |
| 14                             | 12.7                                                           | 16.4       | 13.2                                                                                       | 7.5     | 33.0       | 18.8       | 17.5                                                            | 45.6      |
| 15                             | 3.4                                                            | 5.4        | 3.6                                                                                        | 2.0     | 10.9       | 6.2        | 4.7                                                             | 15.1      |
| 16                             | 7.4                                                            | 12.8       | 7.7                                                                                        | 4.4     | 25.8       | 14.7       | 10.2                                                            | 35.7      |
| 17                             | 1.6                                                            | 0.6        | 1.7                                                                                        | 0.9     | 1.3        | 0.7        | 2.2                                                             | 1.8       |
| 18                             | 2.0                                                            | 0.9        | 2.1                                                                                        | 1.2     | 1.9        | 1.1        | 2.8                                                             | 2.6       |
| 19                             | 1.9                                                            | 1.2        | 1.9                                                                                        | 1.1     | 2.5        | 1.4        | 2.6                                                             | 3.4       |
| 20                             | 1.9                                                            | 0.7        | 2.0                                                                                        | 1.1     | 1.5        | 0.9        | 2.6                                                             | 2.1       |
| 21                             | 2.0                                                            | 1.8        | 2.0                                                                                        | 1.2     | 3.5        | 2.0        | 2.7                                                             | 4.9       |
| 22                             | 1.7                                                            | 0.8        | 1.7                                                                                        | 1.0     | 1.6        | 0.9        | 2.3                                                             | 2.2       |
| 23                             | 5.0                                                            | 10.7       | 5.1                                                                                        | 2.9     | 21.6       | 12.3       | 6.8                                                             | 29.9      |

|                |             |             |             |             |             |             |             |             |
|----------------|-------------|-------------|-------------|-------------|-------------|-------------|-------------|-------------|
| 24             | 2.2         | 2.3         | 2.3         | 1.3         | 4.6         | 2.6         | 3.0         | 6.4         |
| 25             | 1.6         | 0.8         | 1.6         | 0.9         | 1.6         | 0.9         | 2.2         | 2.3         |
| 26             | 3.6         | 5.3         | 3.7         | 2.1         | 10.7        | 6.1         | 5.0         | 14.8        |
| 27             | 1.9         | 1.3         | 2.0         | 1.1         | 2.6         | 1.5         | 2.6         | 3.6         |
| 28             | 2.2         | <b>31.1</b> | 2.2         | 1.3         | <b>62.6</b> | <b>35.6</b> | 3.0         | <b>86.6</b> |
| 29             | 2.2         | 0.7         | 2.3         | 1.3         | 1.5         | 0.9         | 3.1         | 2.1         |
| 30             | 1.8         | 1.2         | 1.8         | 1.0         | 2.4         | 1.4         | 2.4         | 3.3         |
| 31             | 2.9         | 2.6         | 3.0         | 1.7         | 5.2         | 3.0         | 4.0         | 7.2         |
| 32             | 2.2         | 1.4         | 2.3         | 1.3         | 2.7         | 1.6         | 3.0         | 3.8         |
| 33             | 2.0         | 2.8         | 2.0         | 1.2         | 5.6         | 3.2         | 2.7         | 7.7         |
| 34             | 6.6         | 6.6         | 6.8         | 3.9         | 13.2        | 7.5         | 9.1         | 18.3        |
| 35             | 1.7         | 3.3         | 1.7         | 1.0         | 6.6         | 3.8         | 2.3         | 9.1         |
| 36             | 2.6         | 3.5         | 2.7         | 1.5         | 7.0         | 4.0         | 3.6         | 9.7         |
| 37             | 0.8         | 1.9         | 0.8         | 0.5         | 3.7         | 2.1         | 1.1         | 5.2         |
| 38             | 1.4         | 2.4         | 1.4         | 0.8         | 4.9         | 2.8         | 1.9         | 6.8         |
| 39             | 1.6         | 2.4         | 1.7         | 1.0         | 4.8         | 2.7         | 2.3         | 6.6         |
| 40             | 8.3         | 15.3        | 8.5         | 4.9         | 30.8        | 17.5        | 11.4        | 42.5        |
| 41             | 1.0         | 1.4         | 1.0         | 0.6         | 2.8         | 1.6         | 1.3         | 3.9         |
| 42             | 6.9         | 10.0        | 7.1         | 4.1         | 20.2        | 11.5        | 9.5         | 27.9        |
| 43             | 3.0         | 3.5         | 3.1         | 1.8         | 7.1         | 4.1         | 4.1         | 9.9         |
| 44             | <b>23.6</b> | 8.0         | <b>24.4</b> | <b>13.9</b> | 16.1        | 9.1         | <b>32.5</b> | 22.2        |
| 45             | 1.0         | 1.2         | 1.1         | 0.6         | 2.4         | 1.3         | 1.4         | 3.3         |
| 46             | 1.6         | 2.7         | 1.7         | 1.0         | 5.4         | 3.0         | 2.3         | 7.4         |
| 47             | 1.3         | 1.7         | 1.3         | 0.8         | 3.4         | 1.9         | 1.8         | 4.7         |
| 48             | 0.7         | 1.5         | 0.8         | 0.4         | 3.0         | 1.7         | 1.0         | 4.1         |
| 49             | 2.3         | 4.4         | 2.4         | 1.4         | 8.9         | 5.1         | 3.2         | 12.3        |
| 50             | 14.9        | 25.8        | 15.3        | 8.8         | 52.0        | 29.6        | 20.5        | 71.9        |
| 51             | 5.0         | 15.2        | 5.2         | 3.0         | 30.5        | 17.3        | 6.9         | 42.2        |
| 52             | 1.1         | 0.9         | 1.1         | 0.6         | 1.9         | 1.1         | 1.5         | 2.6         |
| 53             | 1.5         | 1.3         | 1.6         | 0.9         | 2.6         | 1.5         | 2.1         | 3.6         |
| 54             | 0.9         | 1.7         | 1.0         | 0.5         | 3.5         | 2.0         | 1.3         | 4.8         |
| 55             | 1.2         | 2.0         | 1.2         | 0.7         | 4.1         | 2.3         | 1.6         | 5.7         |
| 56             | 1.6         | 1.7         | 1.6         | 0.9         | 3.4         | 1.9         | 2.2         | 4.7         |
| 57             | 1.5         | 2.7         | 1.5         | 0.9         | 5.5         | 3.1         | 2.0         | 7.6         |
| 58             | 1.5         | 1.8         | 1.6         | 0.9         | 3.6         | 2.0         | 2.1         | 5.0         |
| 59             | 1.6         | 1.7         | 1.6         | 0.9         | 3.5         | 2.0         | 2.2         | 4.8         |
| 60             | 3.2         | 1.7         | 3.3         | 1.9         | 3.4         | 2.0         | 4.4         | 4.7         |
| Average        | 3.2         | 4.3         | 3.3         | 1.9         | 8.6         | 4.9         | 4.4         | 11.9        |
| Median         | 1.9         | 1.8         | 2.0         | 1.1         | 3.7         | 2.1         | 2.6         | 5.1         |
| <b>Maximum</b> | <b>23.6</b> | <b>31.1</b> | <b>24.4</b> | <b>13.9</b> | <b>62.6</b> | <b>35.6</b> | <b>32.5</b> | <b>86.6</b> |
| Minimum        | 0.7         | 0.6         | 0.8         | 0.4         | 1.2         | 0.7         | 1.0         | 1.6         |

**Table S2.** Published research on Sn and Sb along the railway.

| Literature source                | Country | Locality                                 | Functional part of railway                      | Distance from the tracks         | Year of soil samples collection | Sn mg/kg              | Sb mg/kg              |
|----------------------------------|---------|------------------------------------------|-------------------------------------------------|----------------------------------|---------------------------------|-----------------------|-----------------------|
| Dzierżanowski and Gawroński [14] | Poland  | suburbs of Warsaw                        | between stations                                | 0–1 m from the track embankments | 2011                            | below detection limit | below detection limit |
| Wiłkomirski [15]                 | Poland  | Białystok, Sokółka, Hajnówka and Kuźnica | railway stations: in different functional parts | not specified                    | 2012                            | 3–23                  | not investigated      |
| Staszewski [16]                  | Poland  | Ława Główna                              | railway junction                                | < 2 m                            | 2008                            | 4–33                  | not investigated      |

**Table S3.** Bioavailable concentrations and percentage of bioavailable concentrations for Sn and Sb.

| No. of site | Bioavailable concentrations |          | Percentage of bioavailable concentrations |      |
|-------------|-----------------------------|----------|-------------------------------------------|------|
|             | Sn mg/kg                    | Sb mg/kg | Sn %                                      | Sb % |
| 1           | 0.0006                      | 0.001    | 0.015                                     | 0.10 |
| 2           | 0.0009                      | 0.004    | 0.006                                     | 0.05 |
| 3           | 0.0005                      | 0.001    | 0.006                                     | 0.14 |
| 4           | 0.0008                      | 0.003    | 0.010                                     | 0.20 |
| 5           | 0.0007                      | 0.007    | 0.009                                     | 0.13 |
| 6           | 0.0005                      | 0.011    | 0.004                                     | 0.19 |
| 7           | 0.0006                      | 0.001    | 0.006                                     | 0.09 |
| 8           | 0.0006                      | 0.002    | 0.009                                     | 0.15 |
| 9           | 0.0006                      | 0.002    | 0.009                                     | 0.17 |
| 10          | 0.0008                      | 0.004    | 0.011                                     | 0.25 |
| 11          | 0.0015                      | 0.001    | 0.021                                     | 0.07 |
| 12          | 0.0015                      | 0.025    | 0.008                                     | 0.28 |
| 13          | 0.0005                      | 0.002    | 0.003                                     | 0.02 |
| 14          | 0.0010                      | 0.047    | 0.002                                     | 0.17 |
| 15          | 0.0006                      | 0.004    | 0.004                                     | 0.05 |
| 16          | 0.0011                      | 0.041    | 0.004                                     | 0.19 |
| 17          | 0.0006                      | 0.001    | 0.009                                     | 0.08 |
| 18          | 0.0005                      | 0.004    | 0.006                                     | 0.28 |
| 19          | 0.0005                      | 0.002    | 0.006                                     | 0.07 |
| 20          | 0.0007                      | 0.004    | 0.009                                     | 0.29 |
| 21          | 0.0007                      | 0.007    | 0.009                                     | 0.24 |
| 22          | 0.0006                      | 0.002    | 0.009                                     | 0.16 |
| 23          | 0.0013                      | 0.009    | 0.006                                     | 0.05 |
| 24          | 0.0008                      | 0.009    | 0.009                                     | 0.23 |
| 25          | 0.0008                      | 0.005    | 0.013                                     | 0.35 |
| 26          | 0.0007                      | 0.028    | 0.005                                     | 0.32 |
| 27          | 0.0007                      | 0.004    | 0.009                                     | 0.20 |
| 28          | 0.0008                      | 0.136    | 0.009                                     | 0.26 |
| 29          | 0.0009                      | 0.002    | 0.009                                     | 0.14 |
| 30          | 0.0009                      | 0.002    | 0.012                                     | 0.11 |

|         |        |       |       |      |
|---------|--------|-------|-------|------|
| 31      | 0.0005 | 0.007 | 0.004 | 0.17 |
| 32      | 0.0006 | 0.005 | 0.007 | 0.22 |
| 33      | 0.0005 | 0.012 | 0.006 | 0.25 |
| 34      | 0.0006 | 0.036 | 0.002 | 0.33 |
| 35      | 0.0007 | 0.007 | 0.010 | 0.13 |
| 36      | 0.0007 | 0.007 | 0.006 | 0.13 |
| 37      | 0.0006 | 0.001 | 0.018 | 0.04 |
| 38      | 0.0009 | 0.002 | 0.017 | 0.05 |
| 39      | 0.0006 | 0.005 | 0.009 | 0.13 |
| 40      | 0.0006 | 0.003 | 0.002 | 0.01 |
| 41      | 0.0006 | 0.006 | 0.015 | 0.27 |
| 42      | 0.0006 | 0.012 | 0.002 | 0.07 |
| 43      | 0.0008 | 0.013 | 0.006 | 0.23 |
| 44      | 0.0009 | 0.013 | 0.001 | 0.09 |
| 45      | 0.0007 | 0.005 | 0.016 | 0.24 |
| 46      | 0.0006 | 0.015 | 0.009 | 0.34 |
| 47      | 0.0004 | 0.007 | 0.008 | 0.24 |
| 48      | 0.0006 | 0.003 | 0.020 | 0.10 |
| 49      | 0.0006 | 0.003 | 0.006 | 0.04 |
| 50      | 0.0010 | 0.032 | 0.002 | 0.07 |
| 51      | 0.0013 | 0.016 | 0.006 | 0.06 |
| 52      | 0.0006 | 0.004 | 0.013 | 0.26 |
| 53      | 0.0010 | 0.003 | 0.016 | 0.14 |
| 54      | 0.0005 | 0.004 | 0.013 | 0.14 |
| 55      | 0.0010 | 0.006 | 0.020 | 0.16 |
| 56      | 0.0007 | 0.005 | 0.011 | 0.17 |
| 57      | 0.0006 | 0.001 | 0.010 | 0.03 |
| 58      | 0.0007 | 0.008 | 0.011 | 0.27 |
| 59      | 0.0006 | 0.007 | 0.009 | 0.25 |
| 60      | 0.0006 | 0.010 | 0.005 | 0.34 |
| Average | 0.0007 | 0.011 | 0.009 | 0.17 |
| Median  | 0.0006 | 0.005 | 0.009 | 0.16 |
| Maximum | 0.0015 | 0.136 | 0.021 | 0.35 |
| Minimum | 0.0004 | 0.001 | 0.001 | 0.01 |

**Table S4.** Proportions of soil fractions.

| No. of site | Coarse sand<br>2.0-0.2 mm | Fine sand<br>0.2-0.063 mm | Coarse silt<br>0.063-0.02 mm | Fine silt<br>0.02-0.002 mm | Clay<br>< 0.002 mm |
|-------------|---------------------------|---------------------------|------------------------------|----------------------------|--------------------|
| 1           | 9.7                       | 15.0                      | 21.3                         | 35.0                       | 19.0               |
| 2           | 46.9                      | 14.7                      | 19.1                         | 16.5                       | 2.8                |
| 3           | 6.5                       | 12.3                      | 38.6                         | 35.9                       | 6.7                |
| 4           | 23.9                      | 19.2                      | 26.3                         | 25.2                       | 5.4                |
| 5           | 41.4                      | 13.4                      | 12.4                         | 28.4                       | 4.4                |
| 6           | 27.9                      | 11.8                      | 27.0                         | 26.7                       | 6.6                |
| 7           | 1.8                       | 2.5                       | 44.3                         | 41.6                       | 9.8                |
| 8           | 29.7                      | 17.2                      | 27.0                         | 21.8                       | 4.3                |
| 9           | 36.3                      | 20.8                      | 20.5                         | 19.6                       | 2.8                |
| 10          | 5.3                       | 9.5                       | 47.7                         | 30.7                       | 6.8                |
| 11          | 11.0                      | 22.0                      | 37.2                         | 23.9                       | 5.9                |
| 12          | 41.0                      | 17.6                      | 20.4                         | 16.2                       | 4.8                |
| 13          | 57.3                      | 22.0                      | 14.6                         | 5.6                        | 0.5                |
| 14          | 25.9                      | 25.6                      | 25.0                         | 19.3                       | 4.2                |

|         |      |      |      |      |      |
|---------|------|------|------|------|------|
| 15      | 48.8 | 15.8 | 18.2 | 15.7 | 1.5  |
| 16      | 38.3 | 17.9 | 18.8 | 17.8 | 7.2  |
| 17      | 20.3 | 24.7 | 30.3 | 17.1 | 7.6  |
| 18      | 5.1  | 10.1 | 55.3 | 24.5 | 5.0  |
| 19      | 69.9 | 15.0 | 8.1  | 5.7  | 1.3  |
| 20      | 35.9 | 13.5 | 21.3 | 21.7 | 7.6  |
| 21      | 38.6 | 15.5 | 17.4 | 20.9 | 7.6  |
| 22      | 53.7 | 24.5 | 8.8  | 11.1 | 1.9  |
| 23      | 18.5 | 14.9 | 24.7 | 35.6 | 6.3  |
| 24      | 20.6 | 9.9  | 20.1 | 40.2 | 9.2  |
| 25      | 41.5 | 15.1 | 19.4 | 19.5 | 4.5  |
| 26      | 42.0 | 15.4 | 14.7 | 20.0 | 7.9  |
| 27      | 2.0  | 2.2  | 18.3 | 49.0 | 28.5 |
| 28      | 42.8 | 12.0 | 12.9 | 24.7 | 7.6  |
| 29      | 0.7  | 5.0  | 39.7 | 43.4 | 11.2 |
| 30      | 30.9 | 7.0  | 26.7 | 29.6 | 5.8  |
| 31      | 14.7 | 9.7  | 31.3 | 34.6 | 9.7  |
| 32      | 30.0 | 17.0 | 19.0 | 27.0 | 7.0  |
| 33      | 19.6 | 12.3 | 26.8 | 28.8 | 12.5 |
| 34      | 20.5 | 12.6 | 21.3 | 35.3 | 10.3 |
| 35      | 69.3 | 16.9 | 5.7  | 7.1  | 1.0  |
| 36      | 59.5 | 13.8 | 11.5 | 12.1 | 3.1  |
| 37      | 81.0 | 10.9 | 3.7  | 3.9  | 0.5  |
| 38      | 77.5 | 9.1  | 5.6  | 7.2  | 0.6  |
| 39      | 25.4 | 14.2 | 22.4 | 30.4 | 7.6  |
| 40      | 49.7 | 15.7 | 19.3 | 11.8 | 3.5  |
| 41      | 41.9 | 15.6 | 16.3 | 21.5 | 4.7  |
| 42      | 53.3 | 11.8 | 11.3 | 16.4 | 7.2  |
| 43      | 34.5 | 16.3 | 16.4 | 25.3 | 7.5  |
| 44      | 52.4 | 15.0 | 12.9 | 13.9 | 5.8  |
| 45      | 28.1 | 16.8 | 18.1 | 28.8 | 8.2  |
| 46      | 19.8 | 6.0  | 14.3 | 34.8 | 25.1 |
| 47      | 18.8 | 18.1 | 17.0 | 32.0 | 14.1 |
| 48      | 29.6 | 10.0 | 15.3 | 33.0 | 12.1 |
| 49      | 69.4 | 8.7  | 9.1  | 11.0 | 1.8  |
| 50      | 29.1 | 11.5 | 15.7 | 34.2 | 9.5  |
| 51      | 34.2 | 8.9  | 15.4 | 31.7 | 9.8  |
| 52      | 15.2 | 16.7 | 16.8 | 38.6 | 12.7 |
| 53      | 18.8 | 10.3 | 22.5 | 38.0 | 10.4 |
| 54      | 46.4 | 18.9 | 15.2 | 13.7 | 5.8  |
| 55      | 39.4 | 20.6 | 20.2 | 16.3 | 3.5  |
| 56      | 17.6 | 23.8 | 24.3 | 26.0 | 8.3  |
| 57      | 71.3 | 10.0 | 8.6  | 8.7  | 1.4  |
| 58      | 16.2 | 26.8 | 27.7 | 22.6 | 6.7  |
| 59      | 24.1 | 16.0 | 21.1 | 26.6 | 12.2 |
| 60      | 24.9 | 23.2 | 20.7 | 22.1 | 9.1  |
| Average | 33.4 | 14.7 | 20.7 | 23.9 | 7.27 |
| Median  | 29.9 | 15.0 | 19.2 | 24.2 | 6.75 |
| Maximum | 81.0 | 26.8 | 55.3 | 49.0 | 28.5 |
| Minimum | 0.70 | 2.20 | 3.70 | 3.90 | 0.50 |
